# Supplementary material for: Remarkably stable inclusion complexes with heptakis-[6-deoxy-6-(2-aminoethylsulfanyl)]-β-cyclodextrin
Source: Royal Society of Chemistry journal article supplement (doi:10.1039/b813999g), 2008-01-01
Supplement: b813999g.pdf [file b813999g.pdf]

## SUPPORTING INFORMATION

### Remarkably stable inclusion complexes with Heptakis-[6-deoxy-6-(2-aminoethylsulfanyl)]- $\beta$ -cyclodextrin

Rodolfo F. Gómez Biagi, Richard B. C. Jagt, Mark Nitz\*

*Department of Chemistry, University of Toronto, 80 St. George Street, Toronto, ON, Canada, M5S 3H6*

#### Contents

|          |                                                                                                                                  |
|----------|----------------------------------------------------------------------------------------------------------------------------------|
| S1.....  | Instrumentation                                                                                                                  |
| S1.....  | ROESY NMR experiments (Figures S1-S5)                                                                                            |
| S11....  | Determination of association constants for host-guest complexes using fluorescence spectroscopy (Figures S6-S25)                 |
| S11..... | Direct titration of <b>1</b> to guests <b>5</b> and <b>6</b>                                                                     |
| S14..... | Direct titration of native $\beta$ -cyclodextrin to guest <b>5</b>                                                               |
| S15..... | Competitive fluorescence experiments with <b>1</b> for guests <b>2-4</b> , <b>7</b> and <b>8</b>                                 |
| S18..... | Competitive fluorescence experiments with native $\beta$ -cyclodextrin for guests <b>2</b> and <b>3</b>                          |
| S19..... | Binding of the lithocholic acid guest <b>4</b> to $\beta$ -cyclodextrin over time when added in DMSO and phosphate buffer pH 7.5 |
| S20..... | Fitting of binding curves                                                                                                        |
| S24....  | Isothermal titration calorimetry                                                                                                 |

## Instrumentation

$^1\text{H}$  NMR spectra were recorded on a Varian 400 spectrometer at  $T = 297$  K. ROESY NMR experiments were conducted on a Varian 500 spectrometer at  $T = 297$  K. Absorption spectra were measured on a Shimadzu UV-2401PC spectrophotometer, whereas fluorescence spectroscopy was performed on a Fluorolog-3 spectrofluorometer. Isothermal Titration Calorimetry was performed on a Microcal calorimeter.

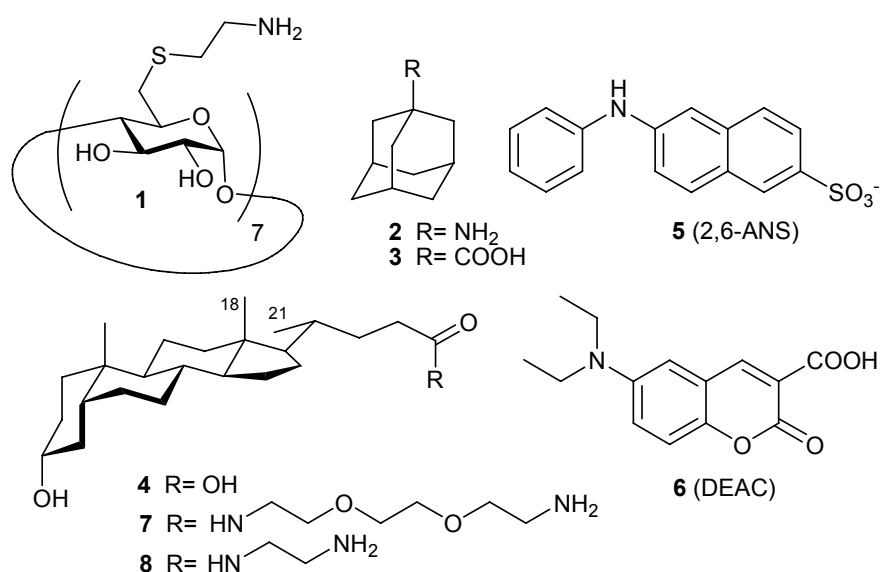

## ROESY NMR experiments

ROESY NMR experiments were performed with 4 mM solutions of the 1:1 complexes of cyclodextrin (CD) **1** and the respective guests (G). A maleic acid buffer (25 mM) and an imidazole buffer (25 mM) were used to adjust the pH of the samples to pH 2.5 and 7.5 respectively.  $^1\text{H}$  NMR spectra of the studied complexes and free **1** are supplied as reference material.

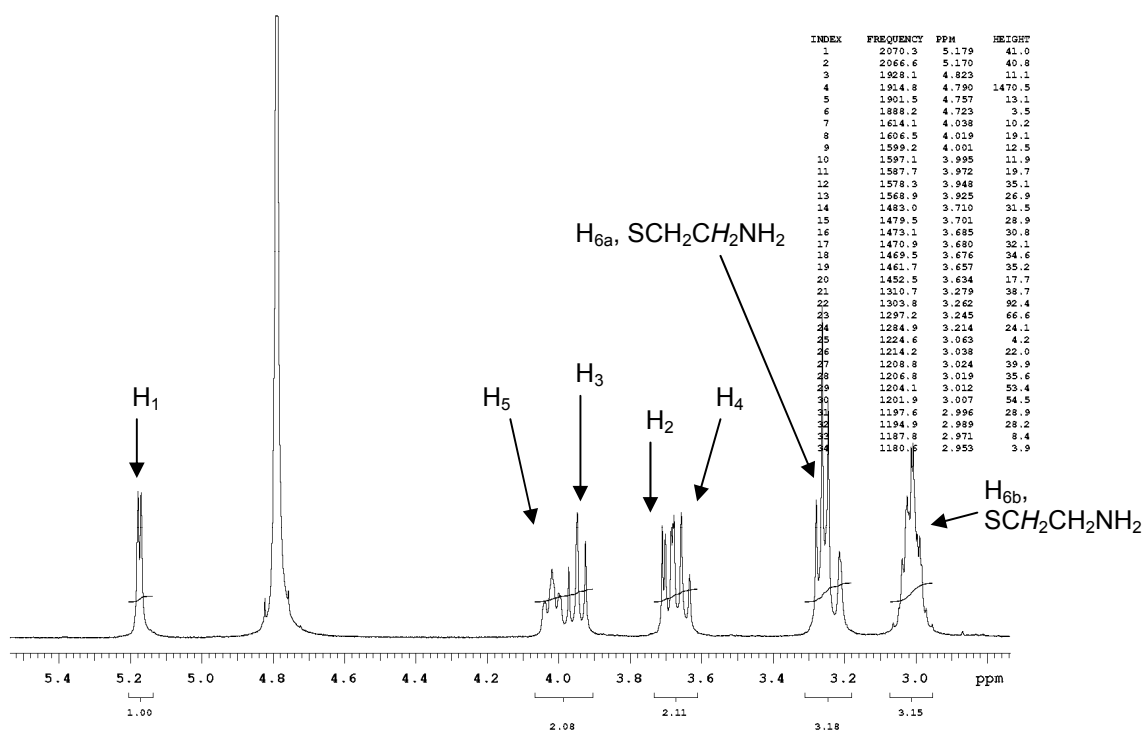

Figure S1a. <sup>1</sup>H NMR CD 1 at pH 7.5

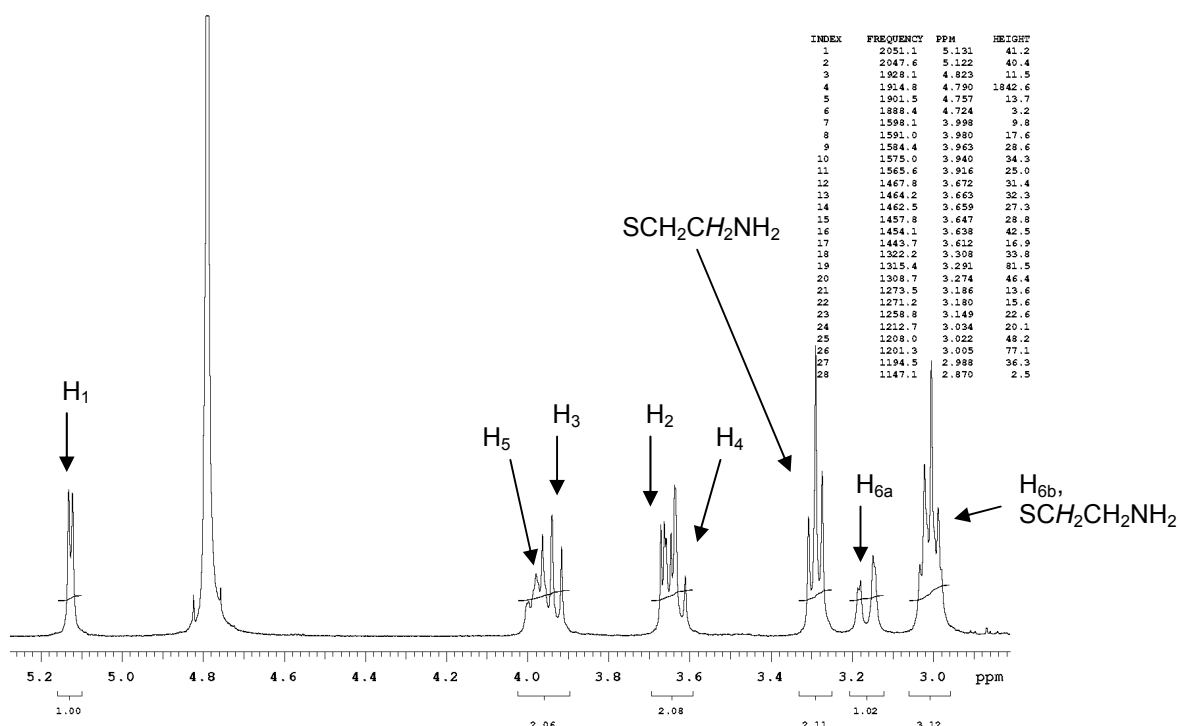

Figure S1b. <sup>1</sup>H NMR free 1 at pH 2.5

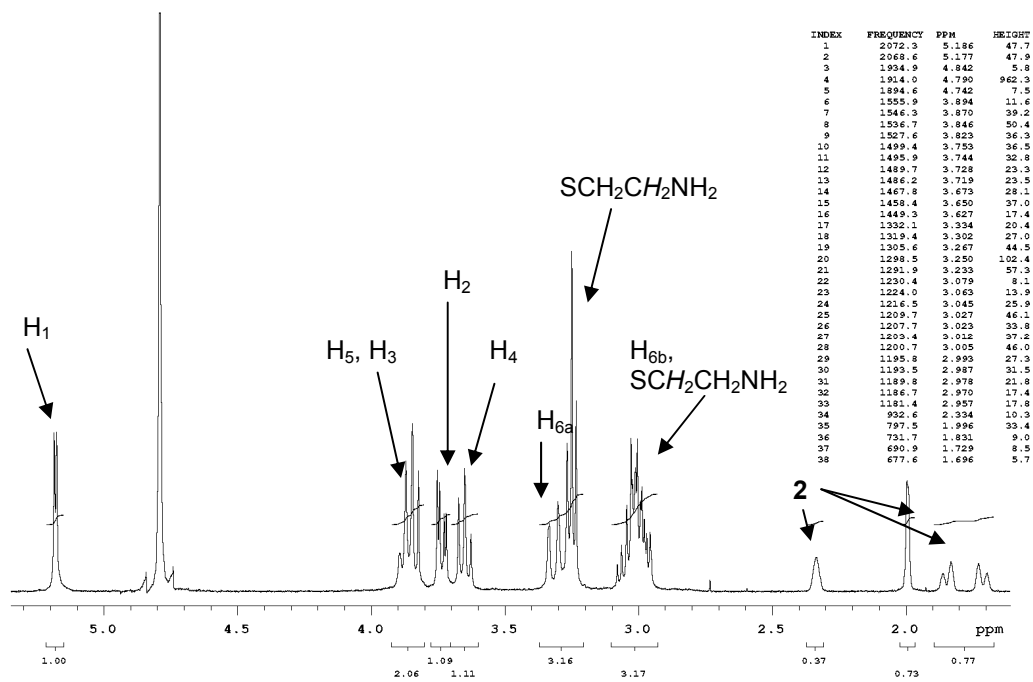

Figure S2a.  $^1\text{H}$  NMR (400 MHz) Complex **1•2** at  $\text{D}_2\text{O}$  pD 7.5

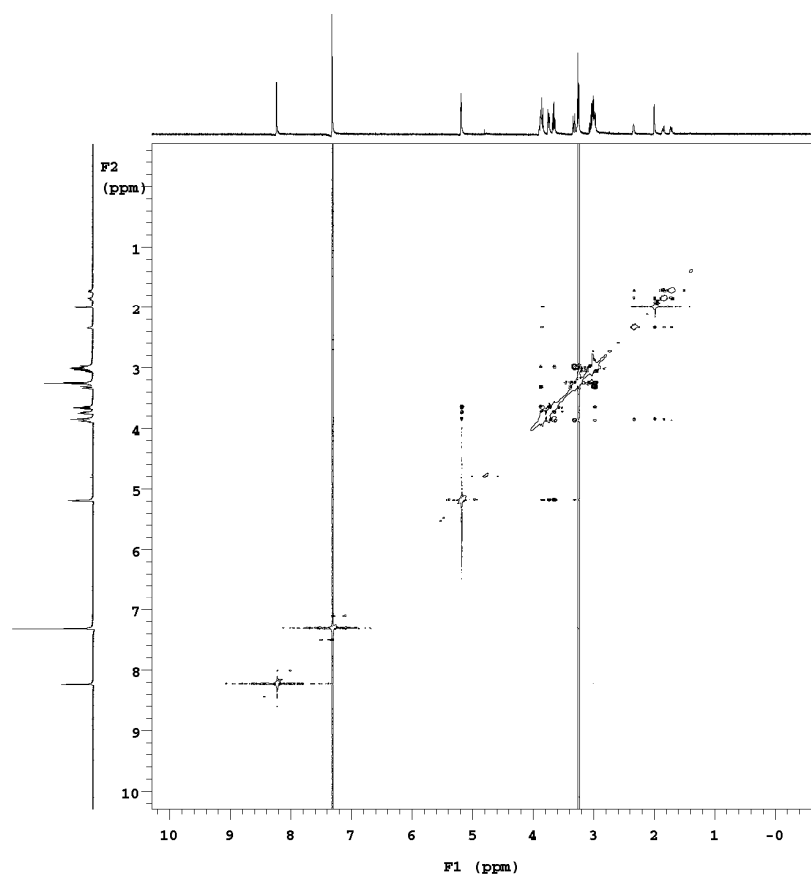

Figure S2b. ROESY (500 MHz) complex **1•2** at  $\text{D}_2\text{O}$  pD 7.5

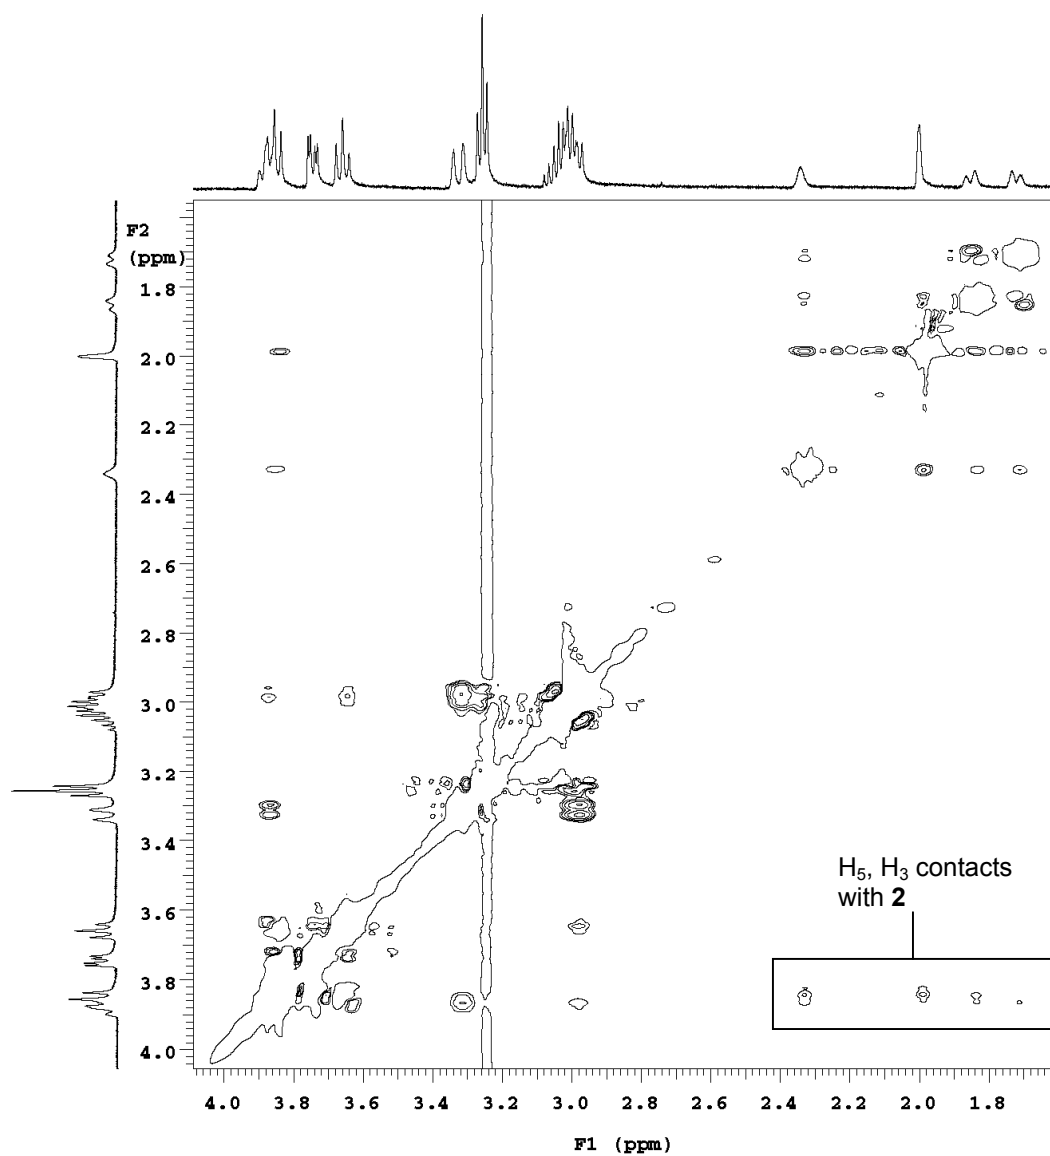

Figure S2C. Expansion of ROESY spectra complex 1•2 at pH 7.5

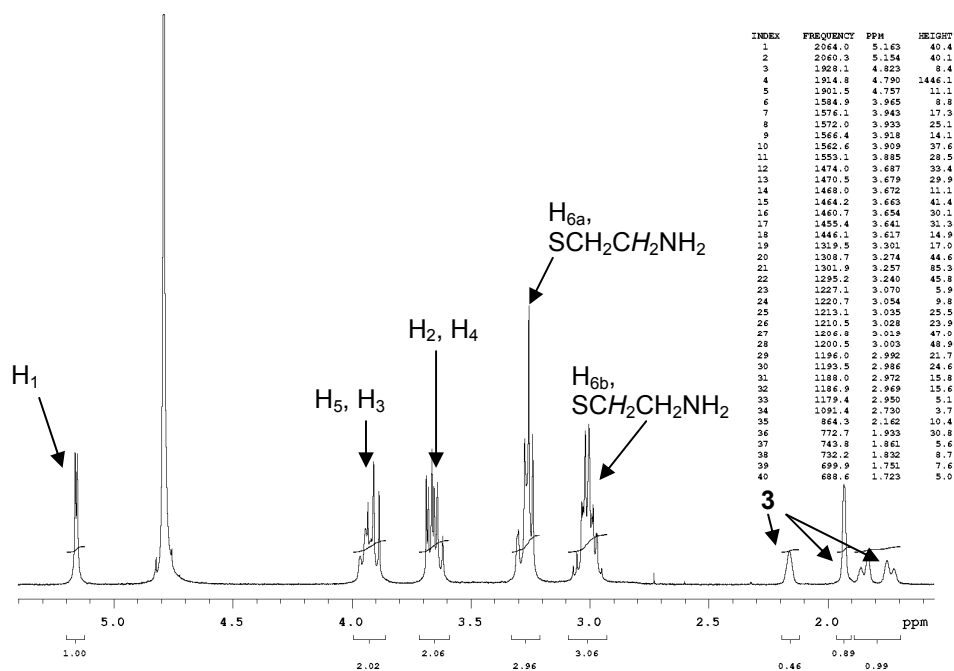

Figure S3a.  $^1\text{H}$  NMR (400 MHz) Complex **1•3**  $\text{D}_2\text{O}$  pD 7.5

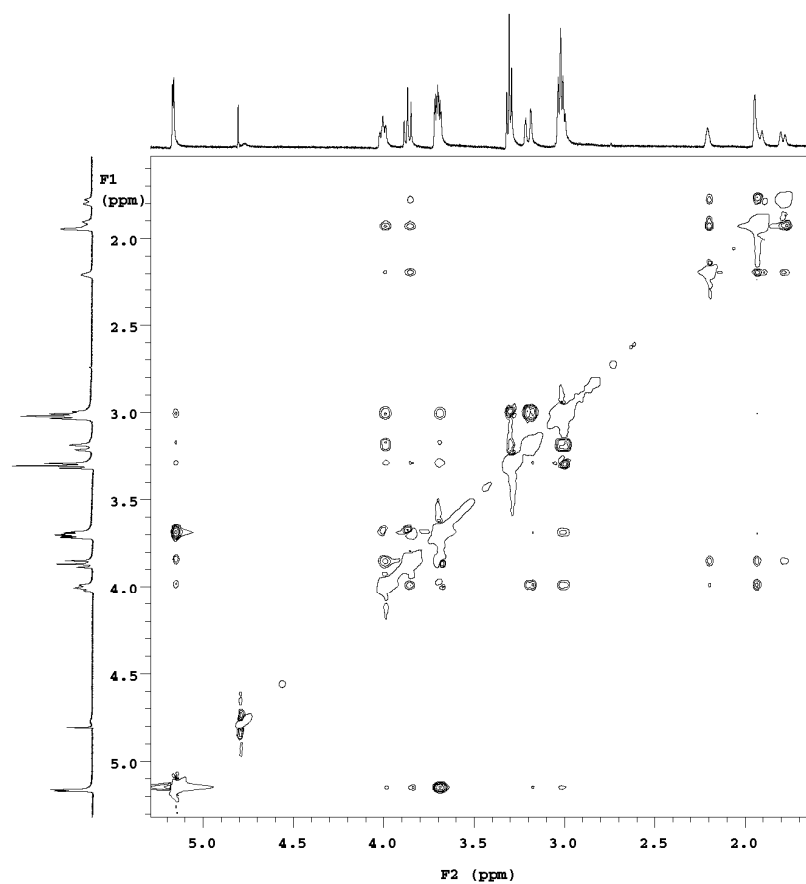

Figure S3b. ROESY NMR (500 MHz) Complex **1•3**  $\text{D}_2\text{O}$  pD 7.5

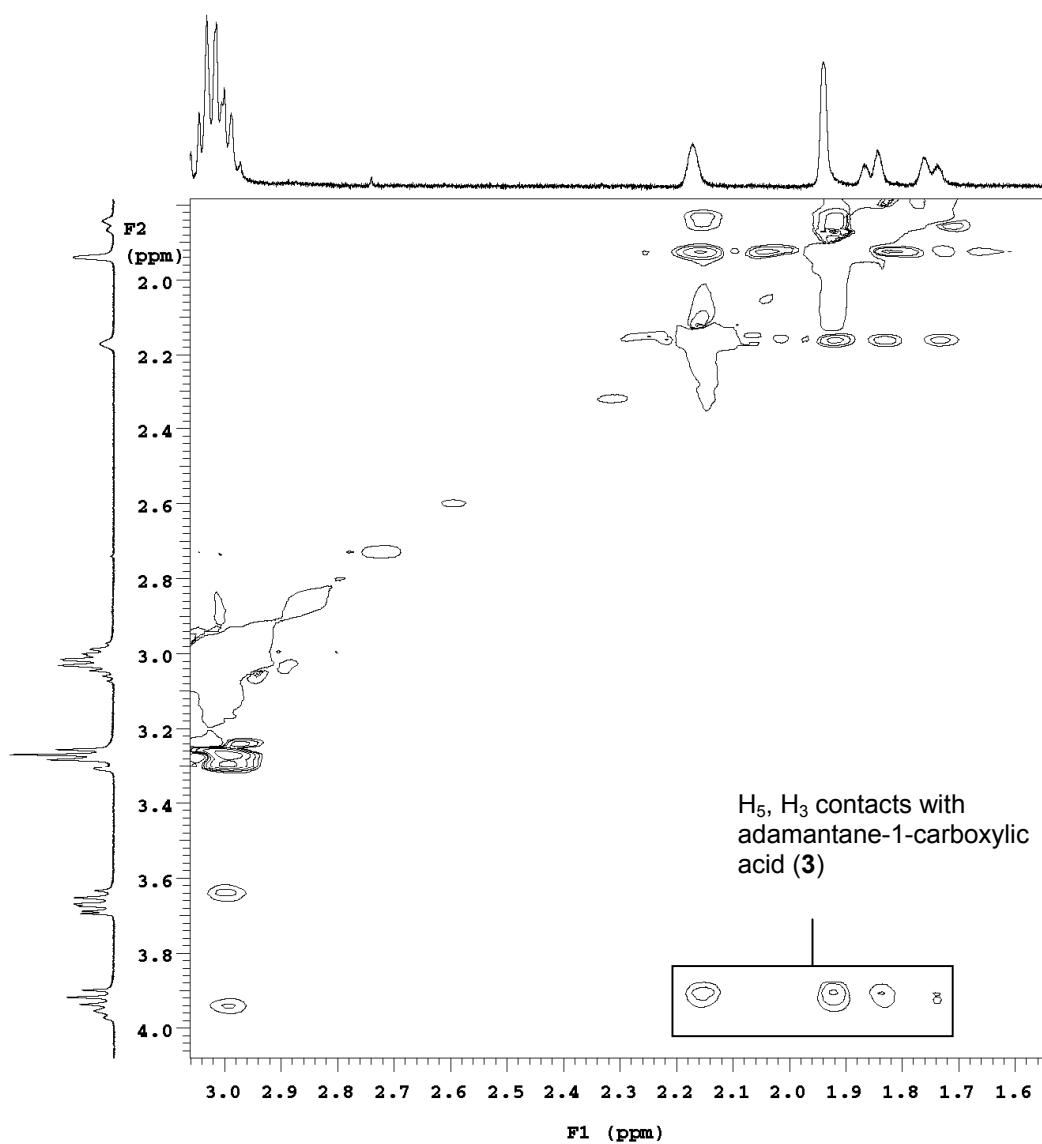

Figure S3c. Expansion of ROESY NMR Complex 1•3

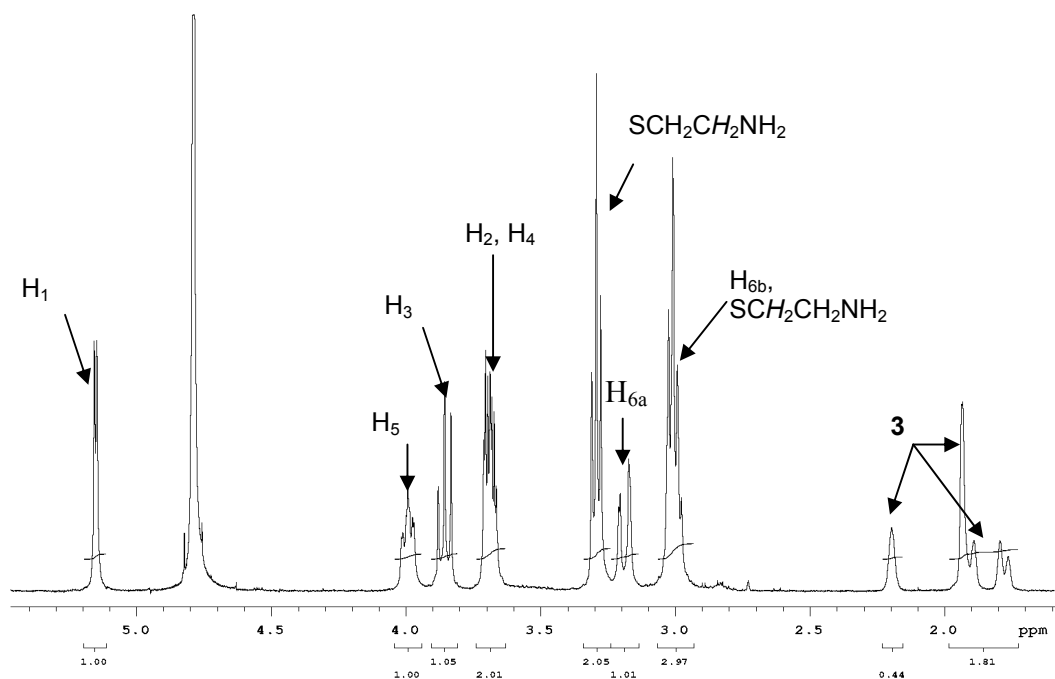

Figure S4a.  $^1\text{H}$  NMR (400 MHz) Complex **1•3**,  $\text{D}_2\text{O}$ , pD 2.5

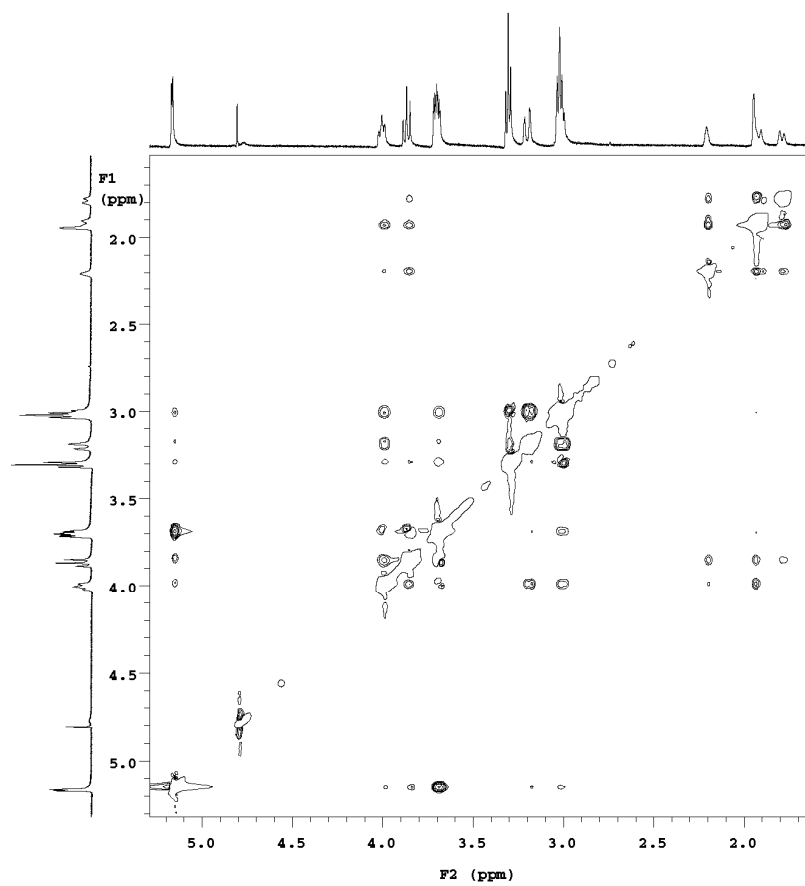

Figure S4b. ROESY NMR (500 MHz) Complex **1•3**,  $\text{D}_2\text{O}$ , pD 2.5



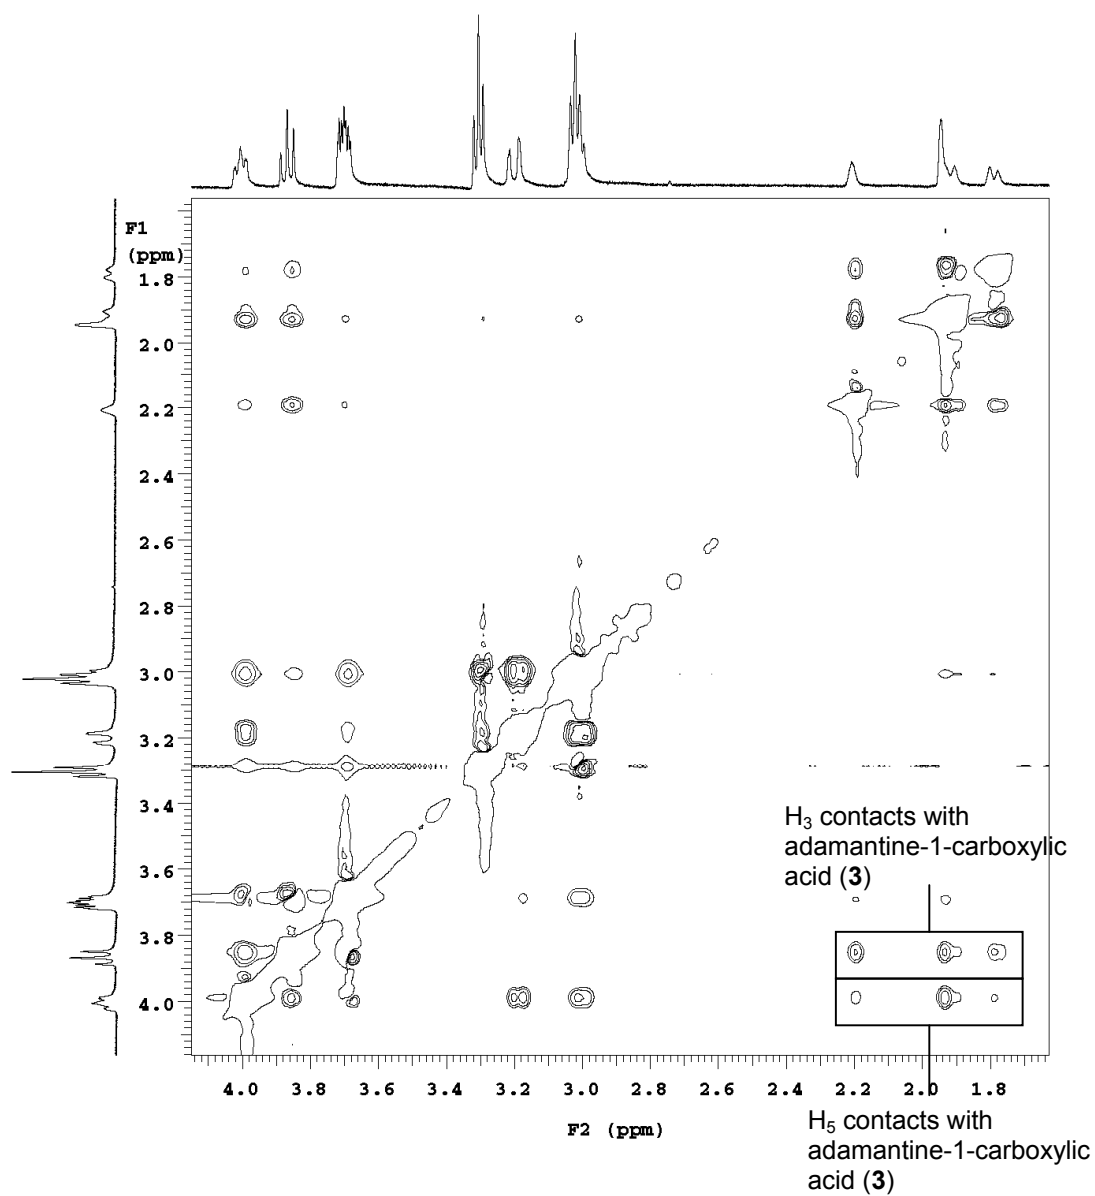

Figure S4c. Expansion of ROESY (500 MHz) of Complex **1•3**, D<sub>2</sub>O, pD 2.5

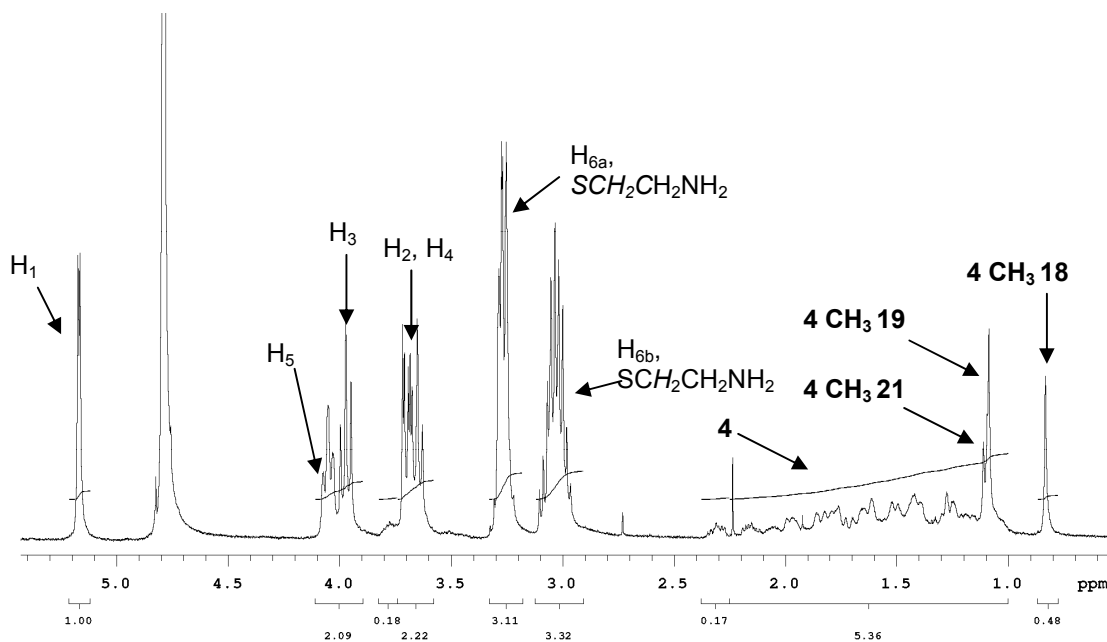

Figure S5a.  $^1\text{H}$  NMR (400 MHz) Complex **1•4**,  $\text{D}_2\text{O}$ , pD 7.5

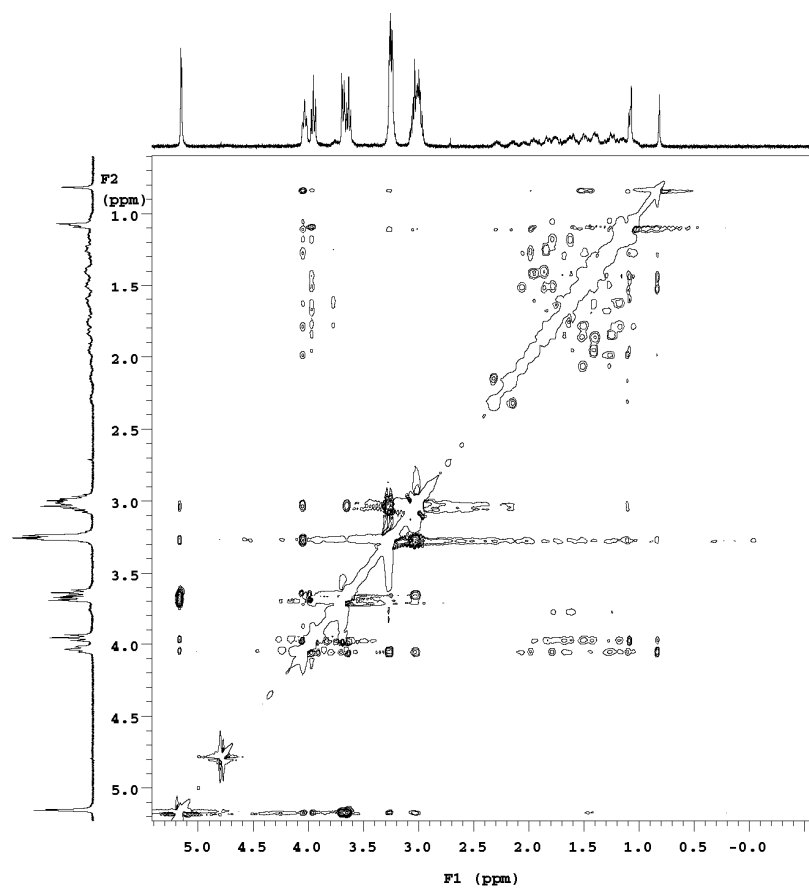

Figure S5b. ROESY NMR (500 MHz) Complex **1•4**,  $\text{D}_2\text{O}$ , pD 7.5

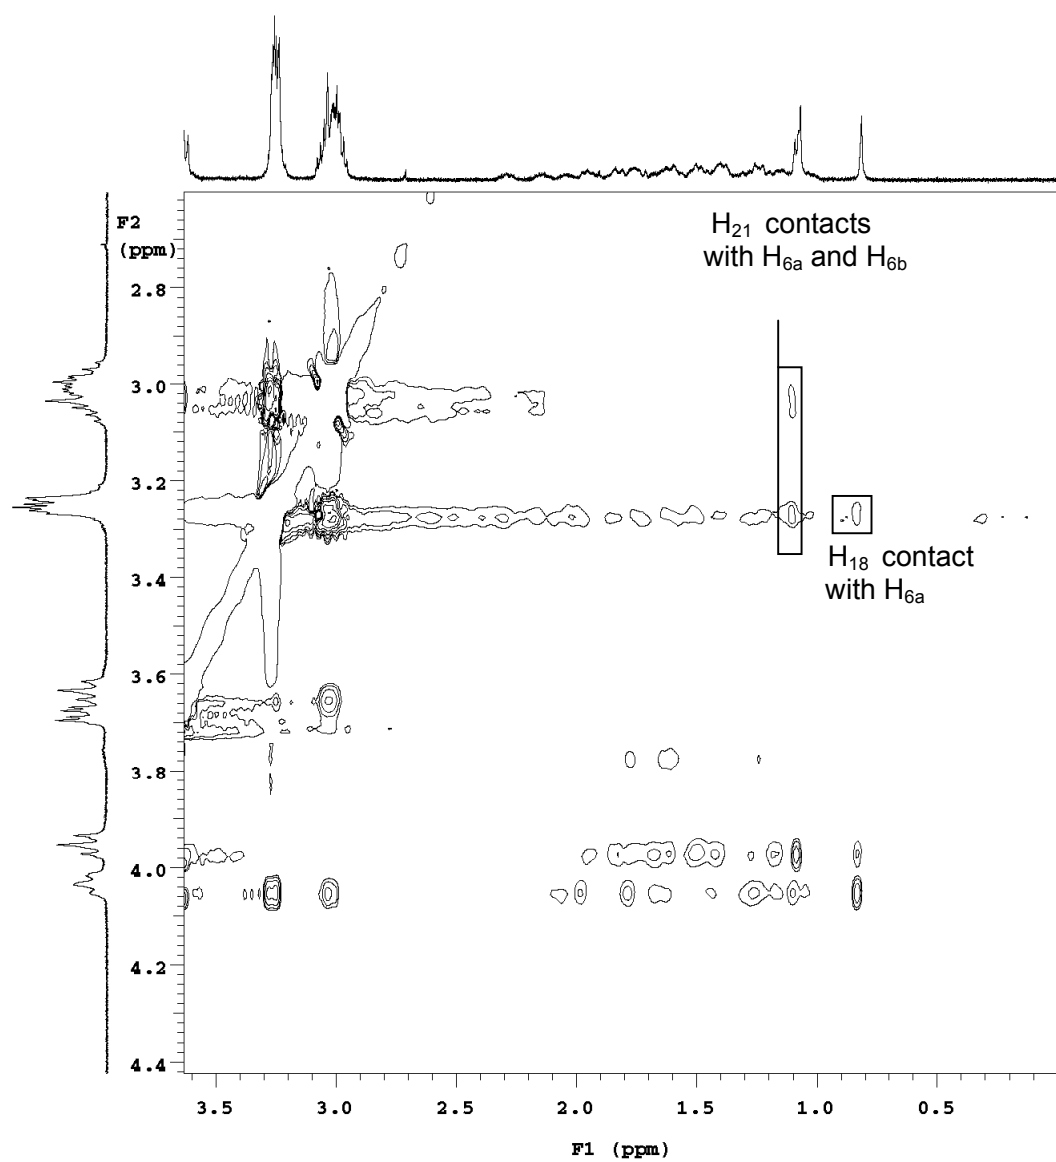

Figure S5c. Expansion of ROESY NMR (500 MHz) Complex **1•4**, D<sub>2</sub>O, pH 7.5

## Determination of association constants for host-guest complexes using fluorescence spectroscopy

### Direct titration of 1 to guests 5 and 6

Due to the large increase in fluorescence emission observed upon complexation, the affinity of the fluorescent dyes 5 and 6 could be measured directly. Phosphate buffers (50 mM) were used to adjust the pH of the samples to pH 2.5 and 7.5. Plotting fluorescence versus the cyclodextrin concentration, the association constants ( $K_a$ ) could be determined by fitting the data to equation (8) derived below. Association constants were calculated from the average of 3 independent titrations. The included graphs are a representative fit of the data.

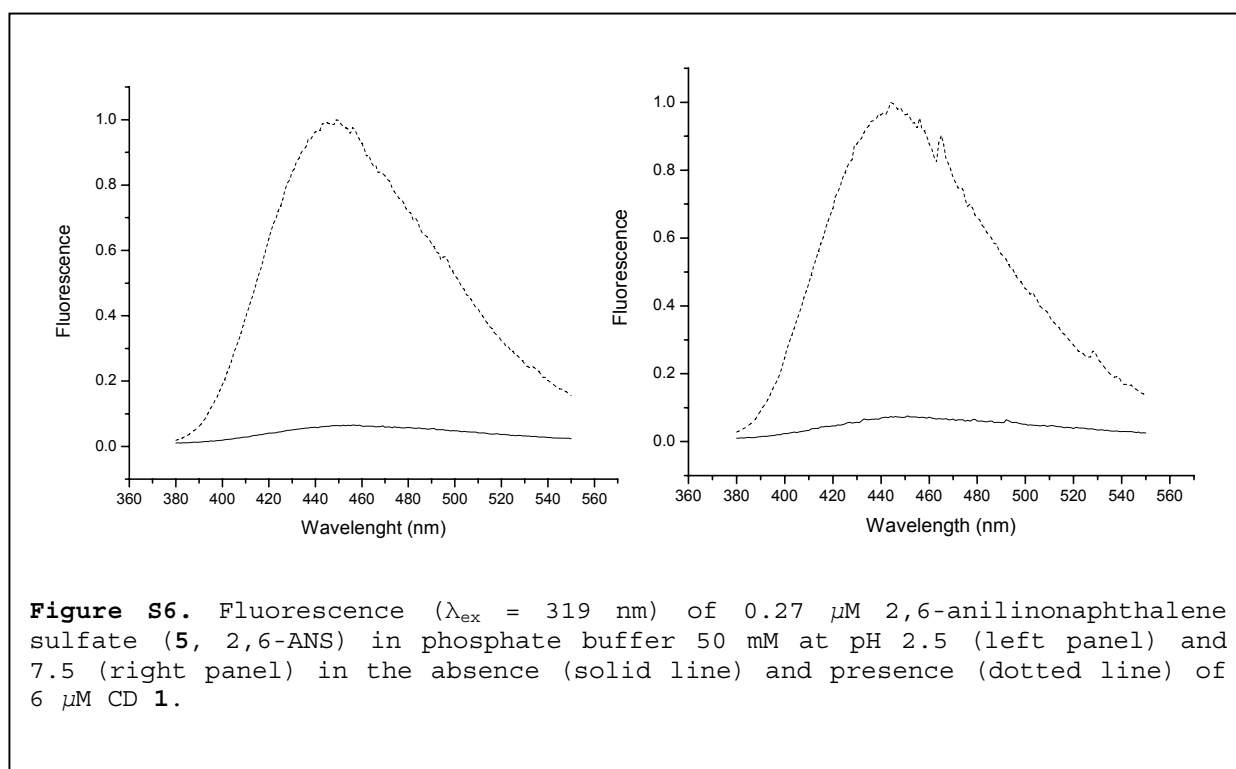

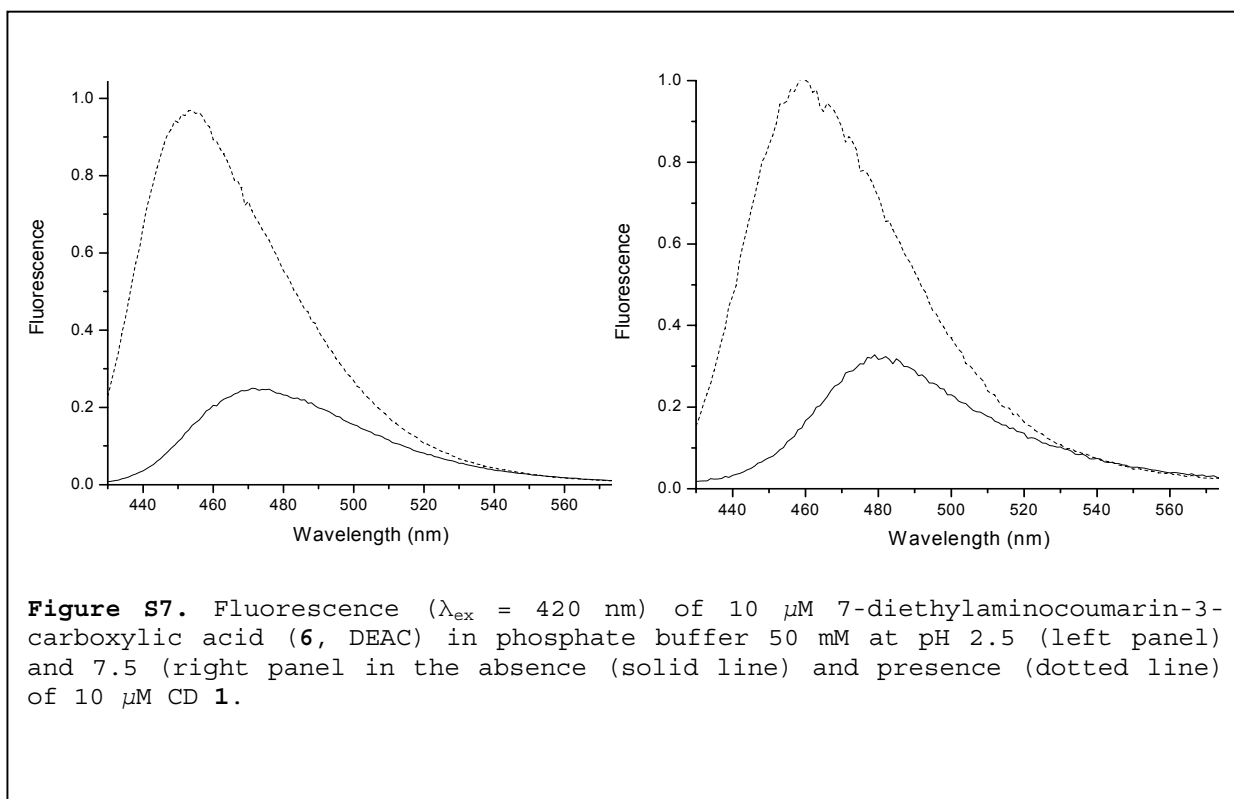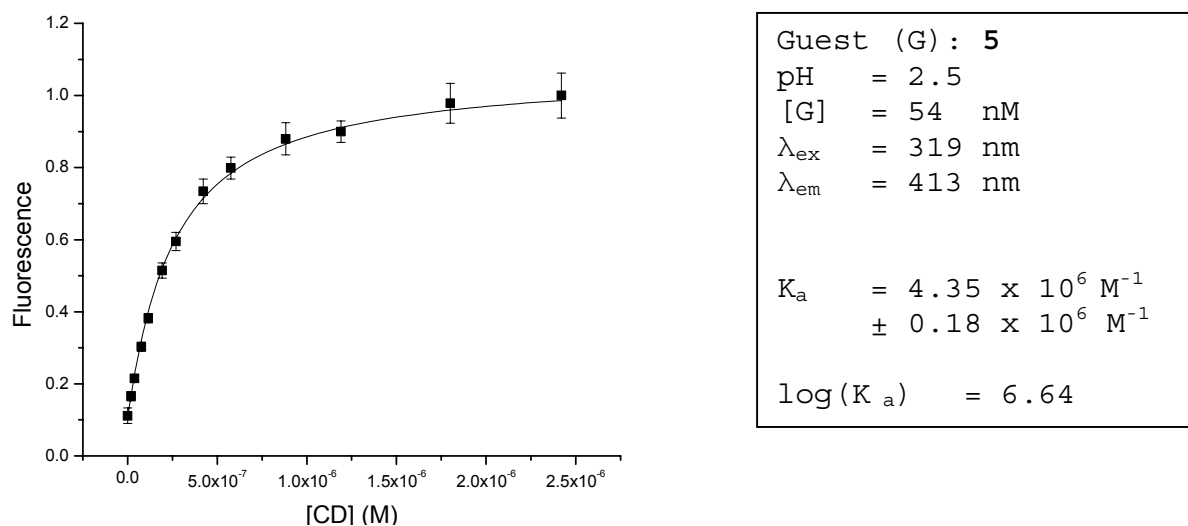

**Figure S8.** Fluorescence titration of **1** with guest **5** pH 2.5

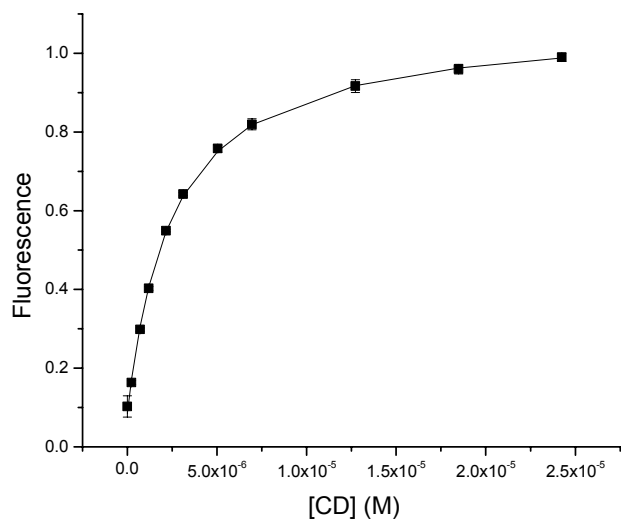

Guest (G) : 5

pH = 7.5

[G] = 54 nM

$\lambda_{ex}$  = 319 nm

$\lambda_{em}$  = 413 nm

$K_a$  =  $4.05 \times 10^5 \text{ M}^{-1}$   
 $\pm 0.049 \times 10^5 \text{ M}^{-1}$

$\log(K_a)$  = 5.61

Figure S9. Fluorescence titration of 1 with guest 5 pH 7.5

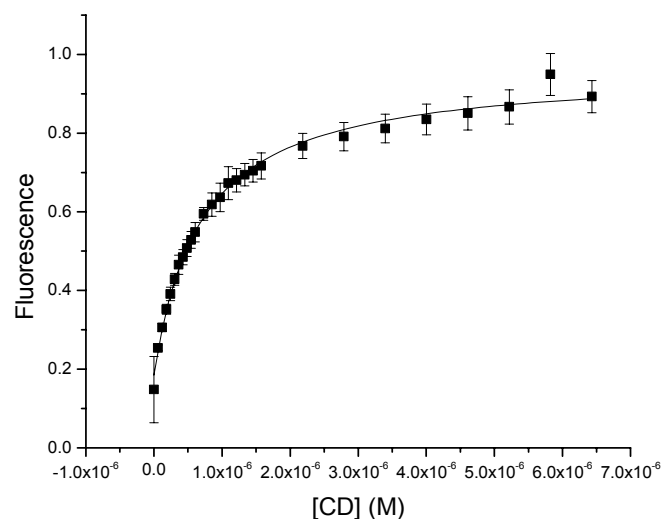

Guest (G) : 6

pH = 2.5

[G] = 6.3 nM

$\lambda_{ex}$  = 420 nm

$\lambda_{em}$  = 456 nm

$K_a$  =  $1.49 \times 10^6 \text{ M}^{-1}$   
 $\pm 0.035 \times 10^6 \text{ M}^{-1}$

$\log(K_a)$  = 6.17

Figure S10. Fluorescence titration of 1 with guest 6 pH 2.5

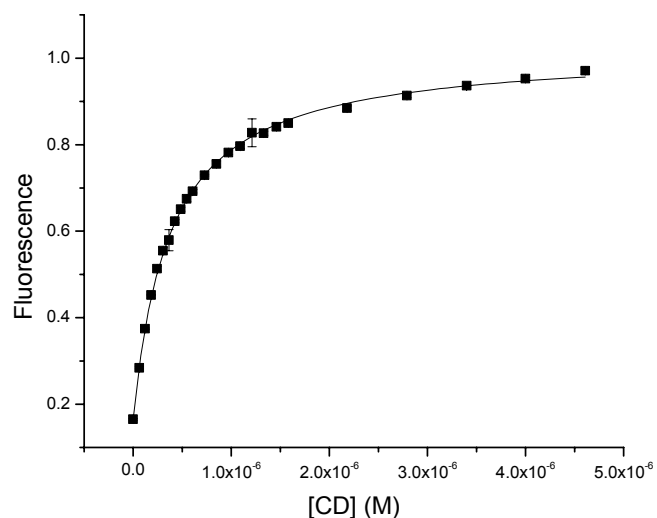

Guest (G) : 6

pH = 7.5

[G] = 5.0 nM

$\lambda_{ex}$  = 420 nm

$\lambda_{em}$  = 456 nm

$K_a$  =  $2.70 \times 10^6 \text{ M}^{-1}$   
 $\pm 0.20 \times 10^6 \text{ M}^{-1}$

$\log(K_a)$  = 6.43

Figure S11. Fluorescence titration of 1 with guest 6 pH 7.5

Direct titration of native  $\beta$ -cyclodextrin to guest 5

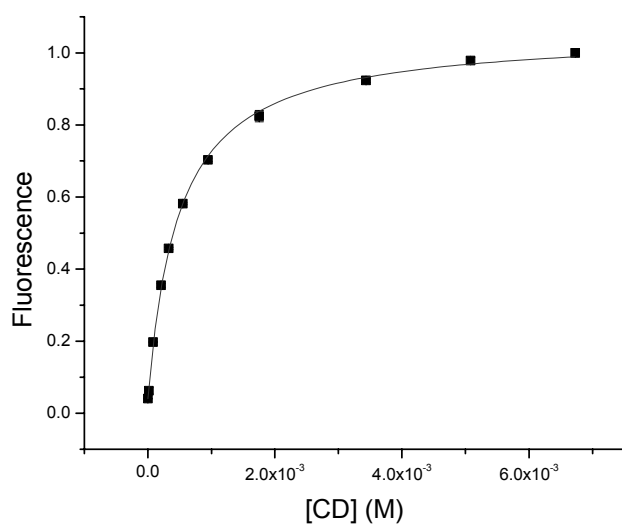

Guest (G) : 5

pH = 2.5

[G] = 4.68  $\mu$ M

$\lambda_{ex}$  = 319 nm

$\lambda_{em}$  = 465 nm

$K_a$  =  $2.08 \times 10^3 \text{ M}^{-1}$   
 $\pm 0.38 \times 10^2 \text{ M}^{-1}$

$\log(K_a)$  = 3.32

Figure S12. Fluorescence Titration of  $\beta$ -CD with guest 5, pH 2.5

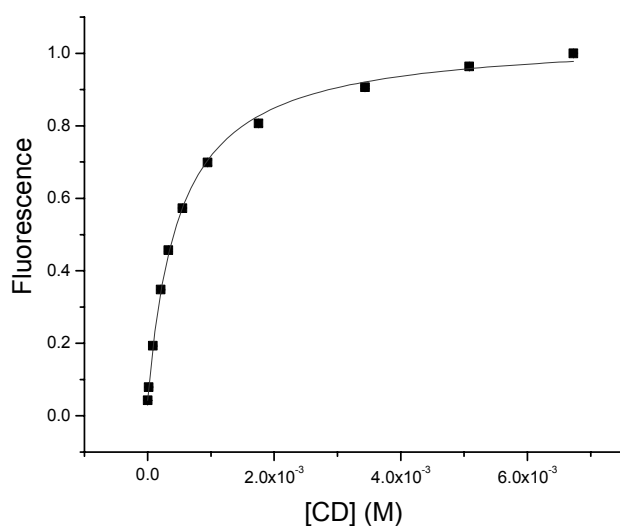

Guest (G) : 5

pH = 7.5

[G] = 4.68  $\mu$ M

$\lambda_{ex}$  = 319 nm

$\lambda_{em}$  = 465 nm

$K_a$  =  $2.06 \times 10^3 \text{ M}^{-1}$   
 $\pm 0.46 \times 10^2 \text{ M}^{-1}$

$\log(K_a)$  = 3.31

Figure S13. Fluorescence Titration of  $\beta$ -CD with guest 5, pH 7.5

Competitive fluorescence experiments of 1 with guests 2-4, 7 and 8

Competitive fluorescence experiments were carried out with the non-fluorescent guests (2, 3, 4 and 7) using *N,N*-4-diethylaminocoumarin-3-carboxylic acid (6) as the fluorescent probe. Plotting fluorescence versus the guest concentration, the association constants ( $K_a$ ) could be determined by fitting the data to equation (14) derived below. Association constants were calculated from the average of 4 independent titrations.

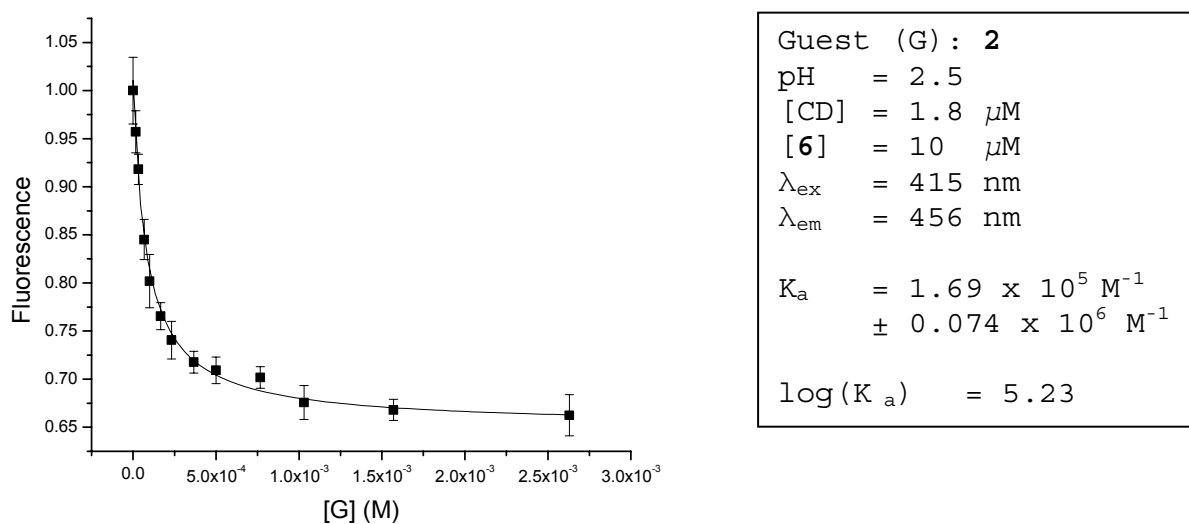

Figure S14. Competitive fluorescence titration of 1 and 6 with guest 2 pH 2.5

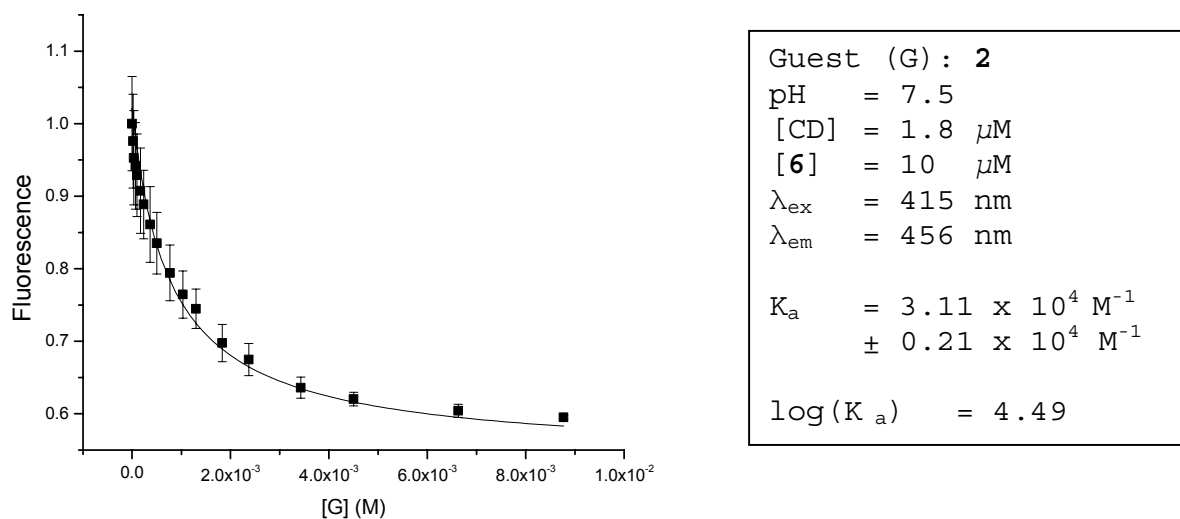

Figure S15. Competitive fluorescence titration of 1 and 6 with guest 2 pH 7.5



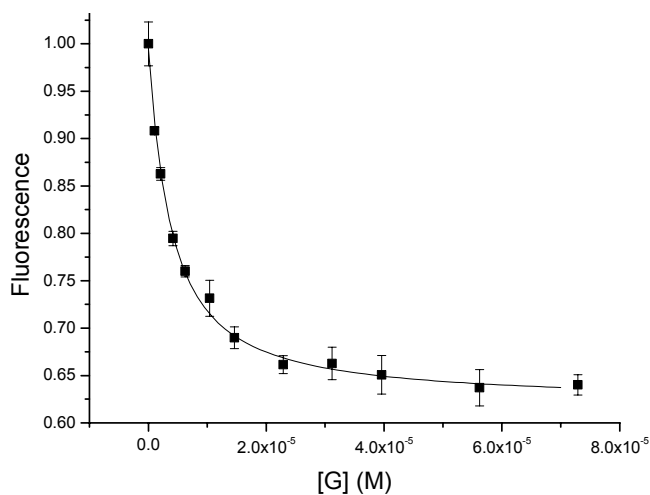

Guest (G) : 3  
pH = 2.5  
[CD] = 1.8  $\mu$ M  
[6] = 10  $\mu$ M  
 $\lambda_{\text{ex}}$  = 415 nm  
 $\lambda_{\text{em}}$  = 456 nm  
 $K_a$  =  $4.65 \times 10^6 \text{ M}^{-1}$   
 $\pm 0.21 \times 10^6 \text{ M}^{-1}$   
 $\log(K_a)$  = 6.67

Figure S16. Competitive fluorescence titration of 1 and 6 with guest 3 pH 2.5

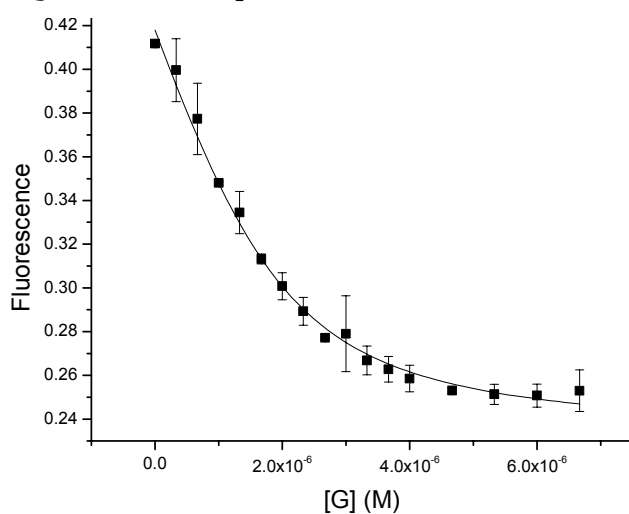

Guest (G) : 3  
pH = 7.5  
[CD] = 1.8  $\mu$ M  
[6] = 10  $\mu$ M  
 $\lambda_{\text{ex}}$  = 415 nm  
 $\lambda_{\text{em}}$  = 456 nm  
 $K_a$  =  $4.35 \times 10^5 \text{ M}^{-1}$   
 $\pm 0.13 \times 10^7 \text{ M}^{-1}$   
 $\log(K_a)$  = 5.64

Figure S17. Competitive fluorescence titration of 1 and 6 with guest 3 pH 7.5

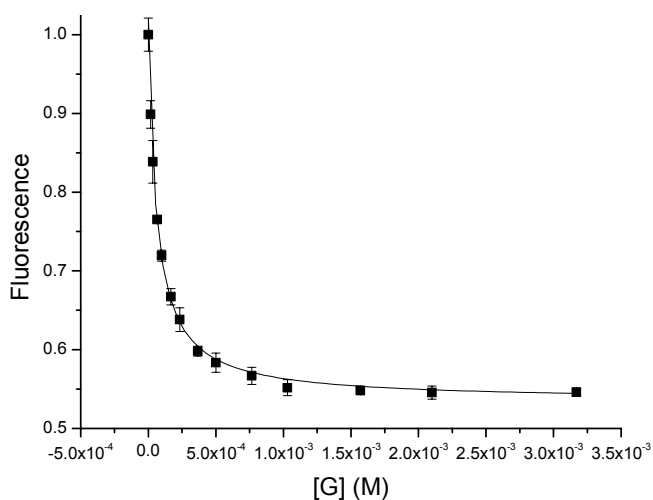

Guest (G) : 4  
pH = 7.5  
[CD] = 1.8  $\mu$ M  
[6] = 10  $\mu$ M  
 $\lambda_{\text{ex}}$  = 415 nm  
 $\lambda_{\text{em}}$  = 456 nm  
 $K_a$  =  $5.52 \times 10^7 \text{ M}^{-1}$   
 $\pm 0.29 \times 10^7 \text{ M}^{-1}$   
 $\log(K_a)$  = 7.74

Figure S18. Competitive fluorescence titration of 1 and 6 with guest 4 pH 7.5

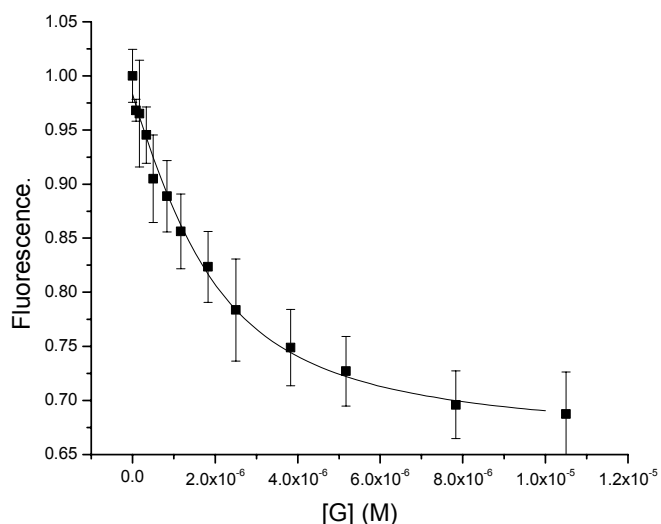

Guest (G) : 7  
pH = 2.5  
[CD] = 1.8  $\mu$ M  
[6] = 10  $\mu$ M  
 $\lambda_{ex}$  = 415 nm  
 $\lambda_{em}$  = 456 nm  
 $K_a$  =  $1.57 \times 10^7 \text{ M}^{-1}$   
 $\pm 0.11 \times 10^7 \text{ M}^{-1}$   
 $\log(K_a)$  = 7.20

Figure S19. Competitive fluorescence titration of 1 and 6 with guest 7 pH 2.5

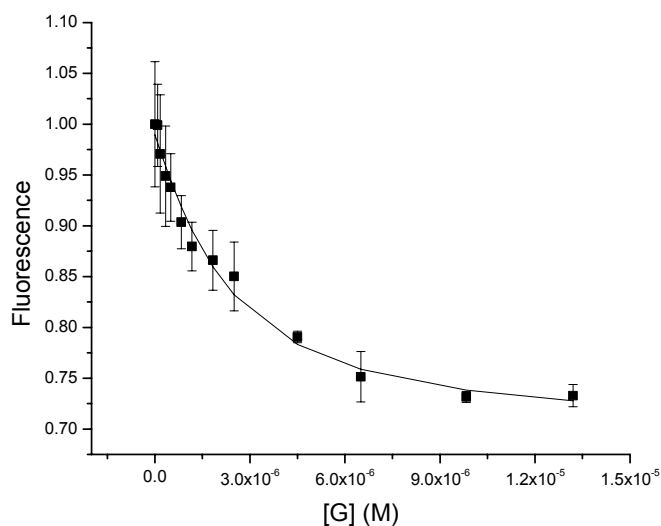

Guest (G) : 7  
pH = 7.5  
[CD] = 1.8  $\mu$ M  
[6] = 10  $\mu$ M  
 $\lambda_{ex}$  = 415 nm  
 $\lambda_{em}$  = 456 nm  
 $K_a$  =  $1.85 \times 10^7 \text{ M}^{-1}$   
 $\pm 0.098 \times 10^7 \text{ M}^{-1}$   
 $\log(K_a)$  = 7.27

Figure S20. Competitive fluorescence titration of 1 and 6 with guest 7 pH 7.5

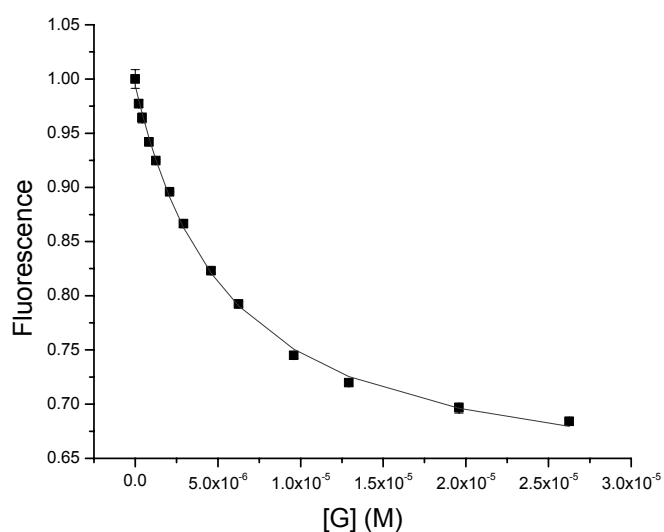

Guest (G) : 8  
pH = 2.5  
[CD] = 1.8  $\mu$ M  
[6] = 10  $\mu$ M  
 $\lambda_{ex}$  = 415 nm  
 $\lambda_{em}$  = 456 nm  
 $K_a$  =  $3.09 \times 10^6 \text{ M}^{-1}$   
 $\pm 0.64 \times 10^4 \text{ M}^{-1}$   
 $\log(K_a)$  = 6.48

Figure S21. Competitive fluorescence titration of 1 and 6 with guest 8 pH 2.5

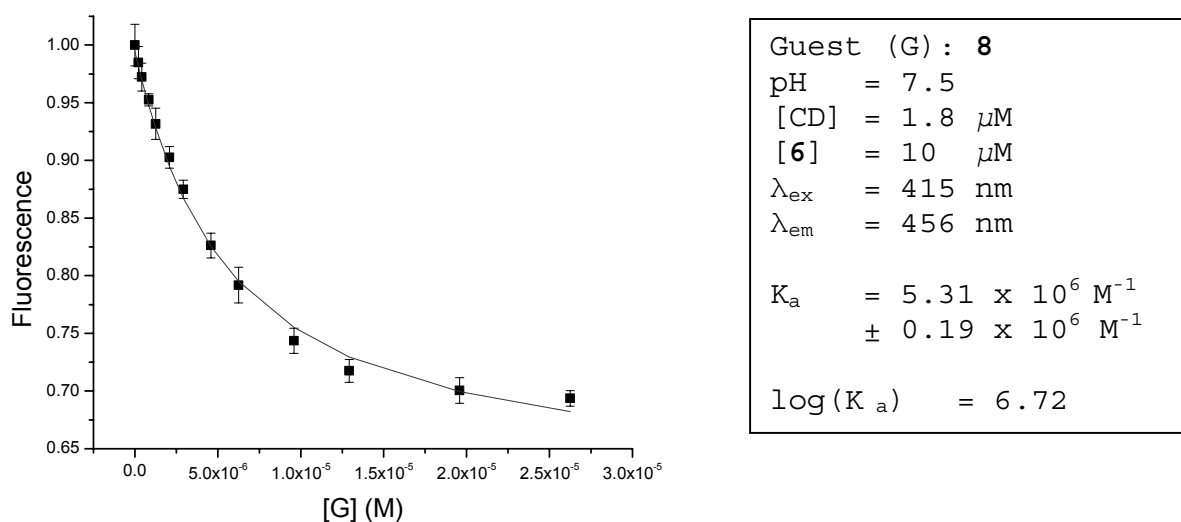

Figure S22. Competitive fluorescence titration of 1 and 6 with guest 8 pH 7.5

Competitive fluorescence experiments with native  $\beta$ -cyclodextrin for guests 2 and 3

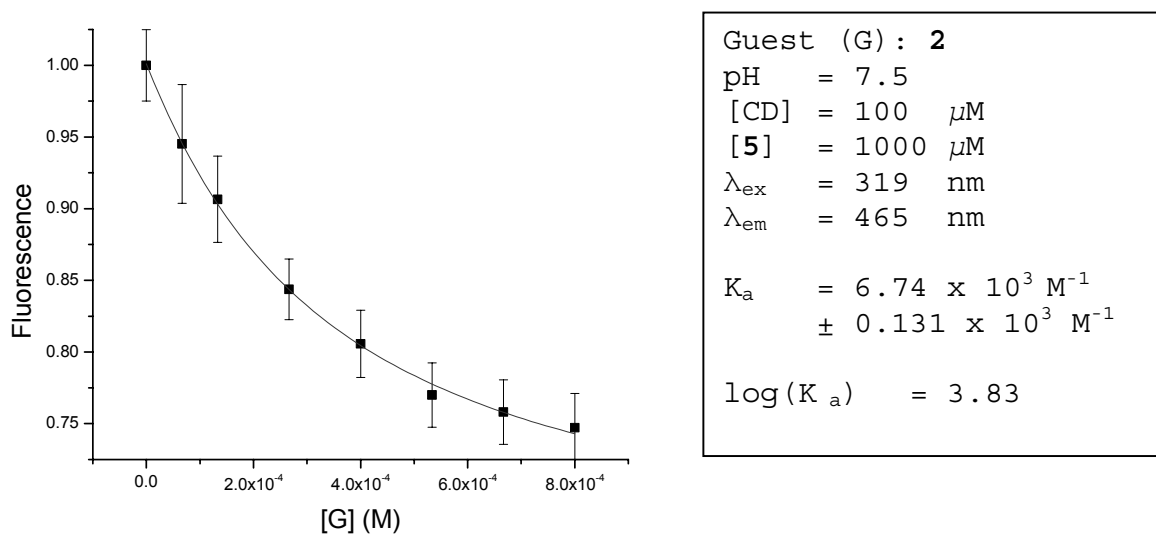

Figure S23. Competitive fluorescence titration of  $\beta$ -CD and 5 with guest 2 pH 7.5

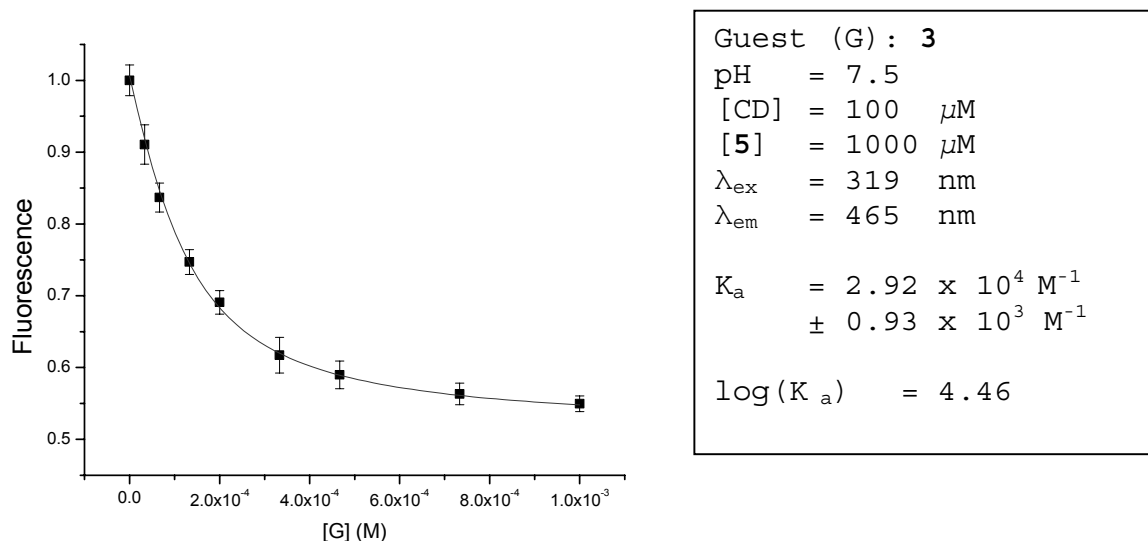

Figure S24. Competitive fluorescence titration of  $\beta$ -CD and 5 with guest 3 pH 7.5

Binding of the lithocholic acid guest 4 to  $\beta$ -cyclodextrin over time when added in DMSO (■) and phosphate buffer pH 7.5 (●)

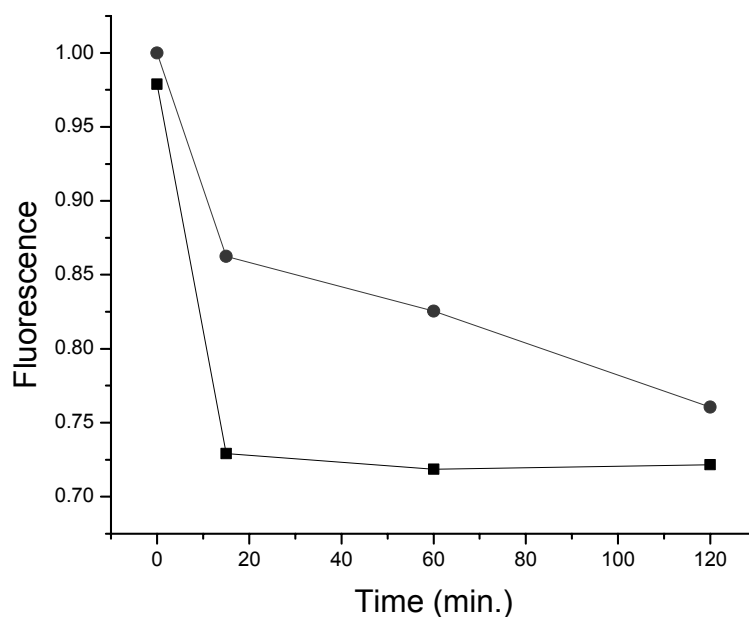

Figure S25. Time course of binding between lithocholic acid guest 4 to 1. CD 1 (1.8  $\mu\text{M}$ ) was dissolved in phosphate buffer (50 mM, pH 7.5) and fluorescent guest 6 (10  $\mu\text{M}$ ) was added. The competitive guest 4 (1.8  $\mu\text{M}$ ) was added either as a solution in DMSO (●) (1.8% final DMSO concentration in solution) or as a colloiddally stable suspension in phosphate buffer (50 mM pH 7.5) (■) at time 0.

## Fitting of binding curves

A) *Direct titrations:*

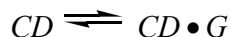

Where CD is cyclodextrin **1** and G is a fluorescent guest molecule.

$$K_G = \frac{[CD \cdot G]}{[CD_F][G_F]}, \quad (1)$$

Where  $[CD_F]$  is the concentration of free **1**,  $[G_F]$  is the concentration of free fluorescent guest, and  $K_G$  is the association constant of the guest and **1**.

$$\%bound \text{ fluorophore} = \frac{(F - F_{min})}{(F_{max} - F_{min})}, \quad (2)$$

Where  $F$  is the fluorescence emission detected and  $F_{min}$  and  $F_{max}$  are the minimum and maximum fluorescence signal that was detected (*i.e.* when  $[CD]=0$  and  $[CD] \gg [G]$ , respectively). Eqn. (3) can then be defined as follows:

$$\frac{[CD \cdot G]}{[G_T]} = \frac{(F - F_{min})}{(F_{max} - F_{min})}, \quad (3)$$

And

$$[G_F] = [G_T] - [CD \cdot G] \quad (4)$$

$$[CD_F] = [CD_T] - [CD \cdot G] \quad (5)$$

Where  $[G_T]$  is the total concentration of the guest molecule and  $[CD_T]$  is the total concentration of **1**. Eqn. (6) was obtained by substituting (4) and (5) into (1):

$$K_G = \frac{[CD \bullet G]}{[CD_T][G_T] - [CD_T][CD \bullet G] - [G_T][CD \bullet G] + [CD \bullet G]^2} \quad (6)$$

And solved for  $[CD \bullet G]$  as a quadratic function where the variable  $x = [CD_T]$ :

$$[CD \bullet G] = \frac{(K_G x + K_G [G_T] + 1) \pm \left( (-K_G x - K_G [G_T] - 1)^2 - 4K_G^2 x [G_T] \right)^{\frac{1}{2}}}{2K_G} \quad (7)$$

We now define  $q$  as:

$$q = \frac{(K_G x + K_G [G_T] + 1) \pm \left( (-K_G x - K_G [G_T] - 1)^2 - 4K_G^2 x [G_T] \right)^{\frac{1}{2}}}{2K_G},$$

By inserting (7) into (3) and solving for  $F$ , the final expression was obtained for the direct titration of a fluorescent guest and **1**,

$$F = \frac{q(F_{\max} - F_{\min}) + [G_T]F_{\min}}{[G_T]} \quad (8)$$

Plotting fluorescence versus  $[CD_T]$ ,  $K_a$  of the fluorophore was determined by fitting the data to (8).

#### B) Competitive titrations

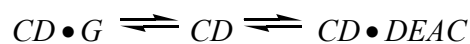

Competitive titration of coumarin **6** (DEAC) versus non fluorescent guest (G) with **1** were fit using the following equation:

$$[G_F] = [G_T] - [CD \bullet G] \quad (9)$$

Where  $[G_F]$  is the concentration of free guest and  $[G_T]$  is the total concentration of guest.

$$K_G = \frac{[CD \bullet G]}{[CD_F][G_F]}, \quad (10)$$

And,

$$[CD \bullet G] = [CD_T] - [CD \bullet DEAC] - [CD_F] \quad (11)$$

Where  $[CD_F]$  is the concentration of free **1** and  $[CD_T]$  is the total concentration of **1**, and  $K_G$  is the association constant of the guest and **1**. Assuming that  $[CD_F]$  remains very small throughout the titration, the  $[CD_F]$  term in equation (11) can be ignored. Expression (12) was obtained by substituting (9) into (10) and subsequently substituting (11) into their ensuing equation,

$$K_G = \frac{([CD_T] - [CD \bullet DEAC])}{[CD_F]([G_T] - [CD_T] + [CD \bullet DEAC])} \quad (12)$$

Rearranging (12) and (1) to equal  $[CD_F]$  (and therefore to each other), by rearranging the resulting (13) was obtained:

$$\begin{aligned} 0 = & [CD \bullet DEAC]^2 (K_C - K_G) \\ & + [CD \bullet DEAC] (-[CD_T] K_C - [DEAC_T] K_C - [G_T] K_G + [CD_T] K_G) \\ & + [CD_T] K_C [DEAC_T] \end{aligned} \quad (13)$$

Solving (13) as a quadratic function, where  $y = [CD \bullet DEAC]$ , and  $x = [G_T]$ ,  $q_2$  was defined as follows:

$$q_2 = \left( \frac{-([CD_T]K_C - K_C[DEAC_T] - K_Gx + K_G[CD_T]) \pm \left( ([CD_T]K_C - K_C[DEAC_T] - K_Gx + K_G[CD_T])^2 - 4(K_C - K_G)[CD_T]K_C[DEAC_T] \right)^{\frac{1}{2}}}{2(K_C - K_G)} \right)$$

Inserting  $q_2$  into (3) (where  $G = DEAC$ ) and solving for  $F$  the final expression for the competitive titration of **6** versus guest and **1** is given,

$$F = \frac{q_2(F_{\max} - F_{\min}) + [DEAC_T]F_{\min}}{[DEAC_T]} \quad (14)$$



## Isothermal titration calorimetry

A solution of **5** was titrated into a solution of **1** at 25° C with 300 rpm stirring. Both solutions were made in phosphate buffer (pH 2.5 and 7.5, 50mM) and dialyzed overnight using 100 MWCO dialysis tubing (spectrapore). The final concentration of **5** was determined using absorbance spectrometry ( $\epsilon = 26,000 \text{ cm}^{-1} \text{ M}^{-1}$ ,  $\lambda_{\text{max}} 319 \text{ nM}$ ). Heats of dilution were determined in separate experiments. The data was fit to a two sequential site binding model. During the curve fitting the association constant of the first binding event was held at the value determined by fluorescence titration. Representative curve fits from titration data are found below. Data reported are the average of two titrations.

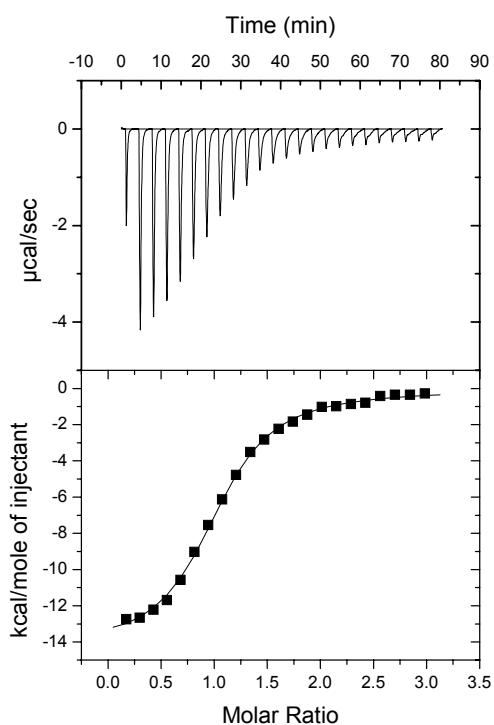

ITC of **5** into **1** at pH 7.5.  
[**1**] = 0.050 mM (Cell)  
[**5**] = 1.1 mM (Titrant)  
**5** was titrated in 8  $\mu\text{L}$  injections, with the exception of the first injection of 3  $\mu\text{L}$

$K_1$   $3.5 \times 10^5 \text{ M}^{-1}$   
 $\Delta H_1$   $-1.431 \times 10^4$   
 $\pm 0.018 \times 10^4 \text{ cal/mol}$   
 $\Delta S_1$   $-22.55 \text{ cal/mol}$   
 $K_2$   $9293 \pm 239 \text{ M}^{-1}$   
 $\Delta H_2$   $-956.0$   
 $\pm 553.3 \text{ cal/mol}$   
 $\Delta S_2$   $14.95 \text{ cal/mol}$

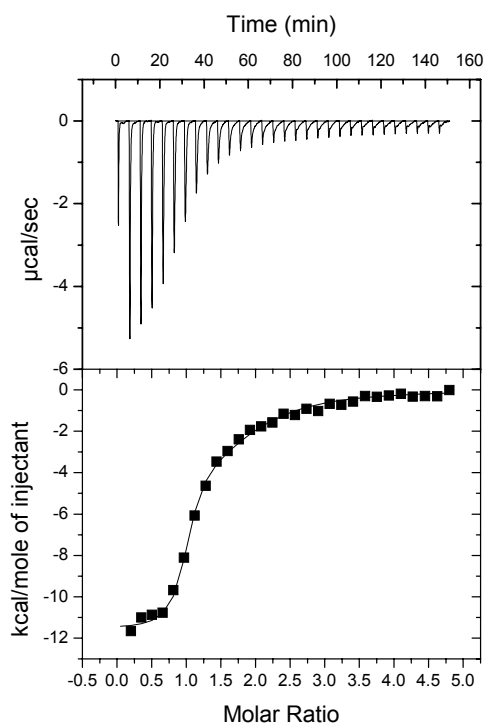

ITC of **5** into **1** at pH 2.5.

[**1**] = 0.060 mM (Cell)

[**5**] = 1.4 mM (Titrant)

**5** was titrated in 9  $\mu\text{L}$  injections, with the exception of the first injection of 3  $\mu\text{L}$

K1  $4.2 \times 10^6 \text{ M}^{-1}$

$\Delta\text{H1}$   $-1.157 \times 10^4$   
 $\pm 0.010 \times 10^4 \text{ cal/mol}$

$\Delta\text{S1}$   $-8.486 \text{ cal/mol}$

K2  $5.326 \times 10^4$   
 $\pm 0.746 \times 10^4 \text{ M}^{-1}$

$\Delta\text{H2}$   $-5151$   
 $\pm 307.3 \text{ cal/mol}$

$\Delta\text{S2}$   $4.347 \text{ cal/mol}$
